# Supplementary material for: Specific histone modifications were associated with the PAH-induced DNA damage response in coke oven workers
Source: Royal Society of Chemistry journal article supplement (doi:10.1039/c6tx00112b), 2016-01-01
Supplement: c6tx00112b1.pdf [file c6tx00112b1.pdf]

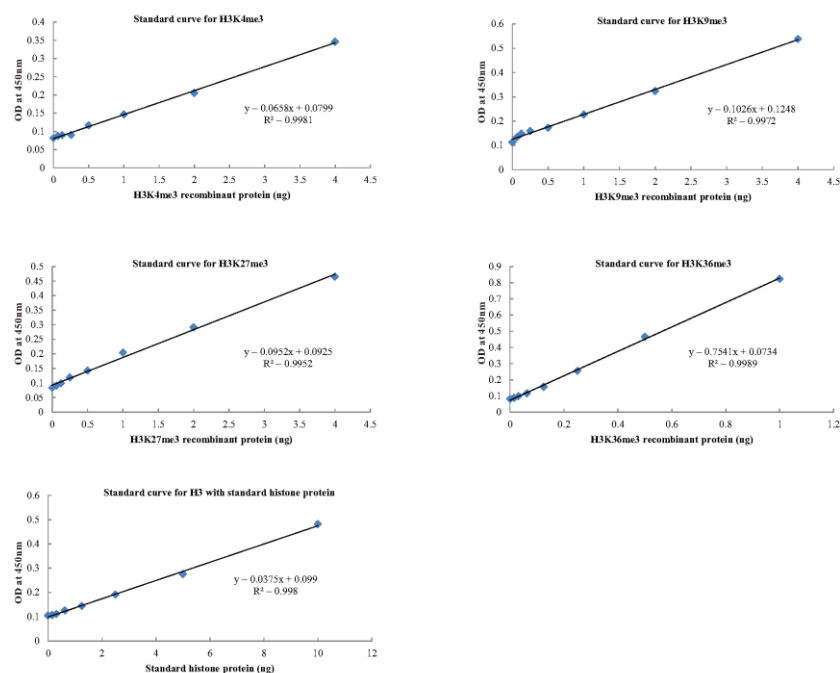

**Supplementary Fig. 1** Standard curves for measurement of global levels of H3K4me3, H3K9me3, H3K27me3, and H3K36me3. Enzyme-linked immunoabsorbent (ELISA) was performed to measure the levels of H3K4me3, H3K9me3, H3K27me3, and H3K36me3 recombinant proteins, and followed by the determining the standard curves. H3 was used as the loading control. All standard curves were performed with concentrations up to where the conditions were linear.

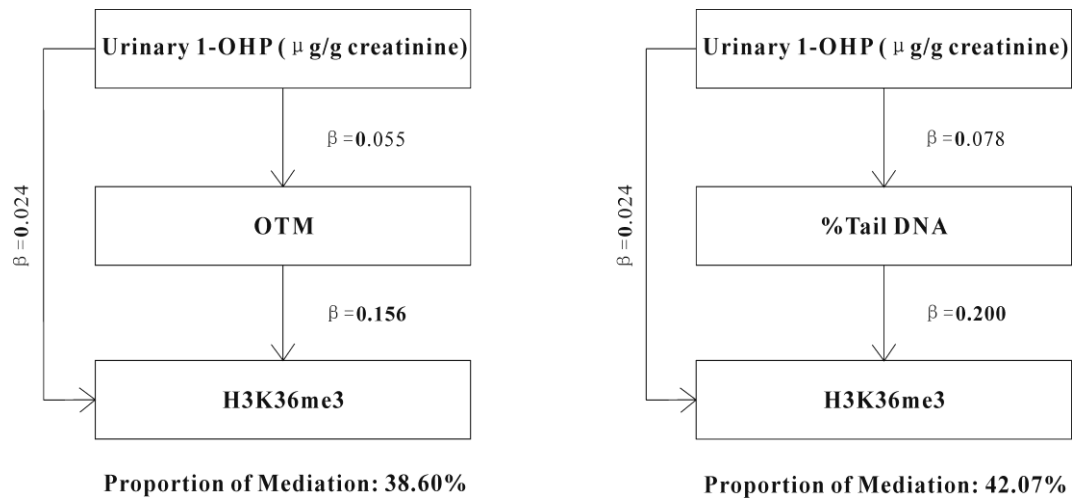

**Supplementary Fig. 2** Mediation analysis of the effect of genetic damage on mediation of PAHs-exposure induced H3K36me3 modification. Model was adjusted for age, BMI, smoking status, alcohol drinking, percentage of lymphocytes, neutrophils, MXD, grilled food consumption. Variables were ln-transformed to improve model fit.
